## Title: Oscillations support short latency co-firing of neurons during human episodic memory formation

5 **Authors: Frédéric Roux<sup>1</sup>, George Parish<sup>1</sup>, Ramesh Chelvarajah<sup>1,2</sup>, David T. Rollings<sup>2</sup>, Vijay Sawlani<sup>1,2</sup>, Hajo Hamer<sup>3</sup>, Stephanie Gollwitzer<sup>3</sup>, Gernot Kreiselmeyer<sup>3</sup>, Marije Ter Wal<sup>1</sup>, Luca Kolibius<sup>4</sup>, Bernhard Staresina<sup>1,5</sup>, Maria Wimber<sup>1,4</sup>, Matthew W. Self<sup>6</sup>, Simon Hanslmayr<sup>\*1,4</sup>**

### Affiliations:

10 <sup>1</sup>School of Psychology, University of Birmingham, Birmingham B15 2TT, United Kingdom

<sup>2</sup>Complex Epilepsy and Surgery Service, Neuroscience Department, Queen Elizabeth Hospital, Birmingham B15 2TH, United Kingdom

<sup>3</sup>Epilepsy Center, Department of Neurology, University Hospital Erlangen, 91054 Erlangen, Germany

<sup>4</sup>Institute of Neuroscience and Psychology, University of Glasgow, Glasgow G12 8QB, United Kingdom

<sup>5</sup> Department of Experimental Psychology, University of Oxford, Oxford, OX2 6GG, United Kingdom

15 <sup>6</sup> Department of Vision and Cognition, Netherlands Institute of Neuroscience, an institute of the Royal Netherlands Academy of Art and Sciences (KNAW), Amsterdam, the Netherlands

**Abstract:** Theta and gamma oscillations in the medial temporal lobe are suggested to play a critical role for human memory formation via establishing synchrony in neural assemblies. Arguably, such synchrony facilitates efficient information transfer between neurons and enhances synaptic plasticity, both of which benefit episodic memory formation. However, to date little evidence exists from humans that would provide direct evidence for such a specific role of theta and gamma oscillations for episodic memory formation. Here we investigate how oscillations shape the temporal structure of neural firing during memory formation in the medial temporal lobe. We measured neural firing and local field potentials in human epilepsy patients via micro-wire electrode recordings to analyze how brain oscillations promote co-incidences of firing between neurons during successful and unsuccessful encoding of episodic memories. The results show that phase-coupling of neurons to faster theta and gamma oscillations correlates with co-firing at short latencies (~20-30 ms) and occurs during successful memory formation. Phase-coupling at slower oscillations in these same frequency bands, in contrast, correlates with longer co-firing latencies and occurs during memory failure. Thus, our findings provide evidence which implicate neural oscillations into the synchronization of neural firing in the medial temporal lobe during the encoding of episodic memories.

## Introduction

50 Episodic memory relies on efficient information transmission within the medial temporal lobe (1-3). More specifically, if one group of neurons drives neural discharges of another group of neurons, synaptic modifications can occur which transform fleeting experiences into durable memory traces (4). The strengthening of synaptic connections between neurons that are active during the experience of an episode depends critically on the temporal structure of neural firing (5-8). Evidence that has accumulated over several decades suggests that coordinated rhythmic activity  
55 may provide a candidate mechanism to establish fine-grained temporal structure on neural firing (9-11). Accordingly, brain oscillations at theta (~3 – 9 Hz) and gamma (~ 40 – 80 Hz) frequencies in the human medial temporal lobe (MTL) have been proposed to promote the formation of memories through the synchronization of neural firing in the MTL (1, 12-14).

60 Studies in animals showed that correlated neural firing is fundamentally involved in the strengthening of synaptic connections (7). Consistent with a critical role of neural synchronization studies in humans using invasive and non-invasive electrophysiological recordings demonstrated that theta and gamma oscillations in the MTL are correlated with memory encoding (1, 15). For instance, stronger phase-coupling of neural firing in theta (16) oscillations has been observed  
65 during successful compared to unsuccessful encoding. A similar result has been obtained in macaques for the high gamma oscillations (>60 Hz; (17)). Furthermore, increased cross-frequency coupling between theta-phase and the power of gamma oscillations for successfully encoded memory items has also been reported in the human medial temporal lobe (18, 19). Therefore, it can be hypothesized that increased synchronization between neural spiking and theta and gamma  
70 oscillations is positively related to memory encoding, presumably via inducing efficient information transmission between neural ensembles.

75 However, efficient information transmission, and synaptic plasticity as a result thereof, may not only be reflected in the absolute level of synchronization, but also in the frequency at which this synchronization occurs. Neurons integrate input over time, with the rate of relaxation of the membrane potential dictating the length of the integration window (10-30 ms for neocortical principal cells; (9)). Relatively faster oscillations integrate neural spikes over shorter time windows compared to relatively slower oscillations. Therefore, considering the fast decay of the membrane potential, a neural assembly which synchronizes firing at faster oscillations is more likely to drive  
80 a down-stream neural assembly compared to synchronization at slower oscillations. Indeed, fast (~65 Hz), but not slow (~40 Hz), gamma oscillations in rodents have been demonstrated to reflect memory encoding processes (20). These results have been replicated recently in humans (21).

85 This study aims to advance our understanding of how brain oscillations within the human MTL mediate neural firing in the service of episodic memory formation. Our understanding of this process is limited because previous studies have either investigated neural oscillations only in the local field potential, or have focused on single frequency bands (i.e., theta or gamma), or have used simple recognition tasks which do not fully tap into the complex association processes underlying episodic memory. A recent study demonstrated a role of sleep spindles for modulating  
90 short-latency co-firing between neurons in the lateral anterior temporal cortex (22), which is consistent with the idea that oscillations in principle can regulate efficient information transfer between neurons. However, little is known about the relevance of such co-firing between neurons

95 or groups of neurons during human memory formation. This study aims to fill these gaps by  
simultaneously recording LFPs and neural firing in parallel from multiple micro-wire electrodes  
during an associative episodic memory task (Figure 1A). Our results show that successful memory  
formation is correlated with spike-LFP coupling at relatively faster theta and gamma oscillations  
as opposed to relatively slower oscillations. Furthermore, we show that gamma oscillations are  
coupled to the phase of theta oscillations specifically for successful memory trials, and that  
100 successful memory trials are characterized by short-latency co-firing of neurons consistent with  
synaptic plasticity principles such as spike-timing-dependent-plasticity (STDP)(6).

## Results

### Memory task and behavior

105 Nine patients with refractory epilepsy participated in 40 sessions of an associative episodic  
memory task (Figure 1A). During the encoding phase of the task, the patient was presented with  
several trials each containing a picture of an animal (cue), which was shown for 2 seconds. Then  
a pair of images appeared which either showed a face and a place, two faces or two places. The  
110 patients were instructed to link the three elements of the episode together by mentally imagining a  
narrative (e.g. “I saw a tiger in the zoo with Stephen Fry”) and press a button to indicate whether  
the invented narrative or combination of images was plausible or implausible, then the next trial  
followed. All images were trial unique. After the encoding phase and a brief distractor test,  
memory performance was assessed by means of a cued recall test. During the test phase the picture  
115 of the animal was presented for 2 seconds and the patient indicated how many stimuli they could  
remember (0, 1 or 2). If they indicated to remember at least one image then a screen with four  
images appeared, and the patient selected the two images that they thought were paired with the  
cue originally. Trials for which both images were correctly recalled are labelled ‘hit’, all other  
trials (i.e., 1 image or both wrong) are labelled ‘miss’. Therefore, contrasting hits with misses  
120 isolates neural processes which support the complete memorization of an episode (as opposed to  
incomplete memories or no memory at all). Any such process has to start when enough information  
is available for the patient to imagine the episode, which is at the onset of the paired images (i.e.,  
2 seconds after the onset of the cue). Therefore, all subsequent analysis focused on the time  
window that followed the onset of the paired images (2-3 seconds; highlighted in Figure 1A).

125

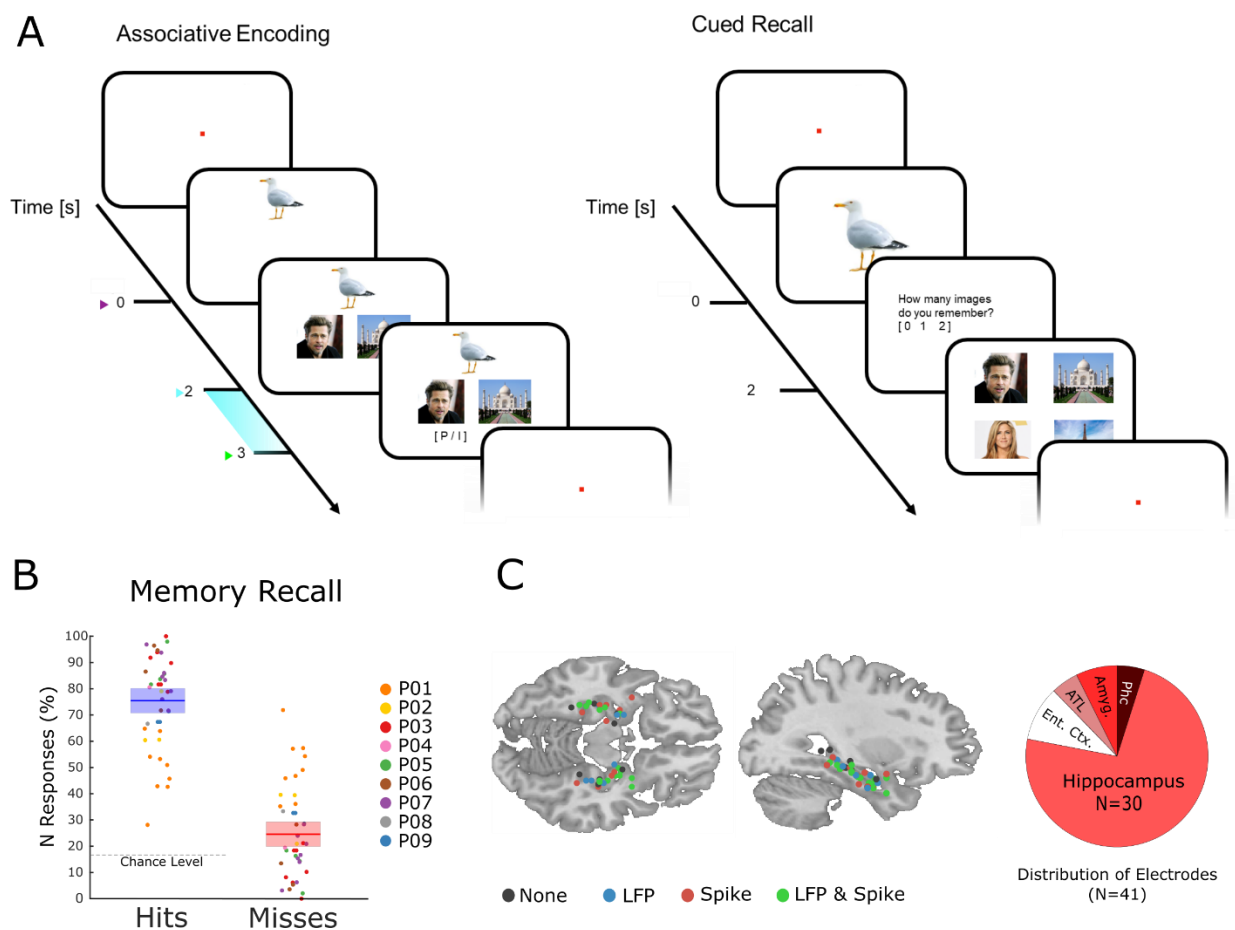

**Figure 1. The memory task and behavioral results.** (A) During encoding patients had to memorize three associated stimuli consisting of an animal, and either a pair of face images, a pair of place images, or a pair of face-place images. The light blue bar highlights the time window that was used for the analysis of LFP and neural spiking data. (B) Memory performance during the cued recall test is shown for all patients and sessions. Note that chance level in this task is 16.6%, and not 50% (see methods for further details). (C) Electrode locations are plotted overlaid onto a template brain in MNI space. Color codes indicate whether an electrode provided LFP, spiking, both, or no data. The pie chart on the right shows the distribution of electrodes across MTL regions (Ent. Ctx.: Entorhinal Cortex; ATL.: Anterior Temporal Lobe; Amyg.: Amygdala; Phc.: Parahippocampal Cortex).

On average patients correctly recalled both associated items on 75.43% (s.d.: 13.3) of the trials (Figure 1B). Note that this is well above chance level (16.6%). The remaining miss trials were approximately evenly distributed between incomplete memories (i.e., only one association recalled; 12.6%) or completely forgotten (i.e., both incorrect; 11.9%). Investigation of differences between the two types of misses (i.e., both incorrect versus one incorrect) was not feasible due to insufficient trial numbers.

### Within-region spike-LFP coupling to fast gamma oscillations correlates with memory

Neural spiking and LFP activity were recorded with Behnke-Fried hybrid depth-electrodes from MTL regions (Figure 1C). Most electrodes (73%) were located in the hippocampus, the rest was located in adjacent MTL regions. Altogether 232 putative single and multi-units were recorded of which 218 were used for further analysis (14 units were rejected because of too low firing rates;

150 see Methods). These units were classified into single-units and multi-units using an automatic procedure based on waveshape homogeneity and inter-spike intervals (23), resulting in 82 putative single-units and 136 putative multi-units (Figure S1). Neural firing during encoding was not modulated by memory for the time window of interest (2-3 seconds). However, hits showed a sustained increase in firing rate compared to misses at a later time window (>3 seconds; Figure S2). LFPs for hits and misses also did not differ in terms of event-related potentials or inter-trial phase coherence (Fig. S3, S4C-D). However, expected differences between hits and misses were obtained in broad band power (24), with hits showing decreased low frequency but increased high frequency power (Fig. S4A-B).

160 Synchronization of neural firing of a single- or multi-unit to the population activity can be measured with spike-field coupling (SFC). SFC can occur at two different spatial levels, locally (within a region) or distally (across regions; Figure 2A). Locally, SFC indicates the firing of a neuron (or neurons for multi-units) being entrained to its surrounding LFP. Distally, SFC likely indicates that the firing of a neuron (or neurons) elicits post-synaptic currents in another region. Because postsynaptic currents reflect the aggregated input to a neuron, distal spike-field coupling is usually interpreted as a functional measure of connectivity, with the spike providing region being the up-stream sender, and the LFP providing region being the down-stream receiver (25-27).  
165 Accordingly, we split spike-LFP pairs into these two categories, i.e., local and distal couplings. SFC was measured with the pairwise phase-consistency index (PPC)(28), which is not biased by the number of observations (e.g., spikes, trials). For distal couplings all possible pairings were considered; that is no constraints were imposed based on anatomy. Connectivity was therefore  
170 measured in a purely data-driven way.

During the time window of interest (2-3 seconds), 192 significantly (Rayleigh test;  $p_{\text{corr}} < 0.05$ ; FDR-correction) coupled spike-LFP pairs were found in the high-frequency range (40-80 Hz), of which 53 were coupled to the local LFP (4.87 % of all possible combinations) and 139 coupled to distal LFPs (2.49% of all possible combinations, Figure 2A). The number of locally coupled pairs was significantly higher than chance (Randomization test;  $p < 0.0001$ ), whereas the number of distally coupled pairs was not ( $p > 0.5$ ). Local spike-field coupling showed a pronounced peak in the fast gamma range (~65 Hz), which was substantially stronger compared to distal couplings (T-test;  $p_{\text{corr}} < 0.05$ ; Figure 2B; FDR-correction). Importantly, the peak frequency of local spike-field coupling varied as a function of memory formation such that hits showed stronger spike-field coupling at a higher frequency (~70 Hz) than misses (~62 Hz; T-test;  $p_{\text{corr}} < 0.05$ ; FDR-correction; Figure 2C). This effect was also significant when using sessions as random variable (T-test;  $t_{19} = 2.21$ ;  $p < 0.05$ ).

185 This pattern suggests a shift in frequency, with hits showing spike-field coupling at a higher gamma frequency compared to misses. To test whether this shift of gamma frequency occurred consistently across spike-LFP pairs a peak detection analysis was conducted where gamma peak frequencies for hits and misses were extracted and compared for each pair. The results confirmed that hits were characterized by significantly faster gamma frequencies compared to misses (T-test;  $t_{36} = 1.96$ ;  $p < 0.05$ ; Figure 2D). Figure 2E shows this effect for one example multi-unit, which couples to a slightly slower gamma rhythm for misses compared to hits. A control analysis, which effectively controls for a possible selection bias due to unbalanced trial numbers revealed similar  
190 results (Figure S5B).

195 A set of control analyses were carried out to address possible concerns about non-stationarity of  
the signal (see Methods and Supplementary Material). First, we carried out a series of simulations  
to ensure that the Wavelet filters used here yield correct phase estimates for non-stationary signals  
(Fig. S6). Second, we repeated the analysis using a Hilbert transform instead of a Wavelet  
transform in combination with a bandpass filter (band-width of 4 Hz for theta and 8 Hz for gamma;  
see Fig. S7). We also analyzed the power spectra of the LFP signal at spike times to ensure the  
presence of a meaningful physiological signal in the phase providing LFP signal (Fig. S8A-C),  
albeit this is not strictly needed for obtaining meaningful spike-LFP coupling results (29, 30).  
200 Finally, we tested whether the absolute amount of spike-LFP coupling differed between hits and  
misses by comparing peak PPC values between hits and misses. No significant differences in peak  
PPCs were observed for the raw PPC values (T-test;  $t_{36}=-1.7098$ ;  $p>0.05$ ) and the selection-bias  
controlled data (T-test;  $t_{36}=1.135$ ;  $p>0.25$ ).

205 Taken together, the phase of fast gamma oscillations temporally organizes spikes within a region.  
Later fully remembered episodes (hits) are distinguished from incomplete or forgotten episodes  
(misses) by the frequency to which spikes are coupled to; with fast gamma oscillations benefiting  
memory formation, and slow gamma oscillations being detrimental for memory formation. This  
effect is unlikely to be caused by differences in stimulus evoked activity since neither ERPs nor  
firing rates showed a memory related difference in the time window of interest (Fig. S3-S4).

210

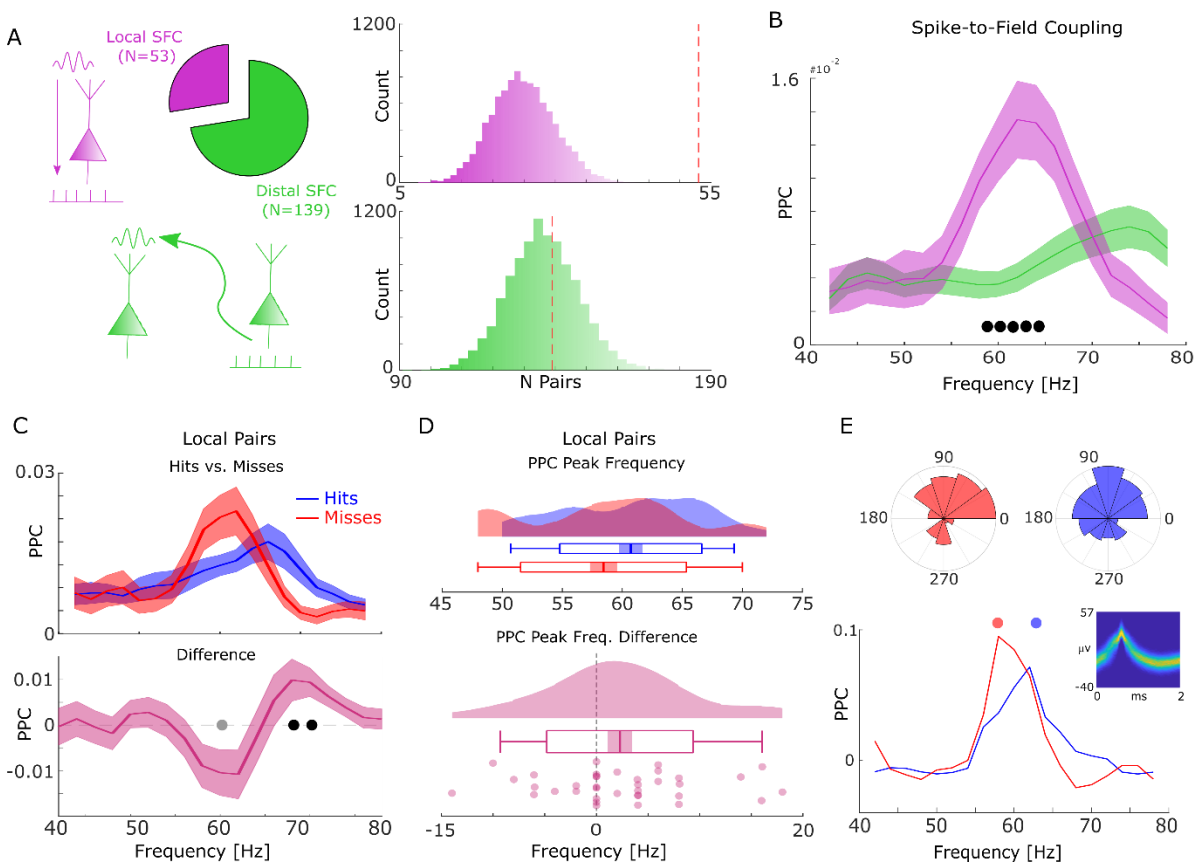

**Figure 2. Spike-field coupling results for gamma.** (A) Number of significant ( $p_{\text{corr}}<0.05$ ) locally (pink) and distally (green) coupled spike-field pairs are shown. The histograms on the right show the results of a randomization procedure

215 testing how many pairs would be expected under the null hypothesis. (B) Pairwise phase consistency (PPC) is plotted  
for local and distal spike-field pairs. Filled circles indicate significant differences ( $p_{\text{corr}} < 0.05$ ). Shaded areas indicate  
standard error of the mean. (C) Pairwise phase consistency (PPC) is shown separately for hits and misses (top panel),  
220 and for the difference between the two conditions (bottom panel) for locally coupled spike-field pairs. Filled black  
circles indicate significant differences ( $p_{\text{corr}} < 0.05$ ). Grey circles indicate statistical trends ( $p_{\text{uncorr}} < 0.05$ ). Shaded areas  
indicate standard error of the mean. (D) Peak frequency in PPC across all spike-field pairs is shown for hits and misses  
(top), and for the difference (hits-misses, bottom). The solid bar indicates the mean, shaded areas indicate standard  
error, the box indicates standard deviation, and the bars indicate 5<sup>th</sup> and 95<sup>th</sup> percentiles. (E) Local gamma spike-field  
225 coupling is shown for one example multi-unit recorded from the entorhinal cortex. Phase histograms on top indicate  
phase distribution for hits at 62 Hz (blue) and misses at 58 Hz (red). Spike wave shapes on the right are plotted by  
means of a 2D histogram.

### Cross-regional Spike-LFP coupling to fast theta oscillations correlates with memory

The same spike-field coupling analysis as above was carried out for the low frequency ranges (2  
– 40 Hz). We identified 103 locally coupled (9.46%), and 387 distally coupled (6.93%) spike-field  
230 pairs (Rayleigh-test;  $p_{\text{corr}} < 0.05$ ; FDR corrected; Figure 3A). For both local and distal couplings the  
number of significant pairs exceeded chance level (Randomization test; both  $p < 0.0001$ ). Local  
couplings showed a peak PPC at around 5 Hz (and another peak at 13 Hz), whereas distal couplings  
showed a peak at around 8-9 Hz (Figure 3B). Local spike-field couplings were robustly stronger  
than distally coupled pairs in the beta frequency range (20-30 Hz).

235 For local spike-LFP coupling no significant differences ( $p_{\text{uncorr}} > 0.05$ ) between hits and misses were  
observed for the low frequency range. In contrast, distally coupled spike-field pairs showed  
stronger coupling for hits compared to misses in the fast theta frequency range (8-10 Hz) and  
higher spike-field coupling for misses compared to hits in the slower theta frequency range (5 Hz;  
Figure 3C, T-test;  $p_{\text{corr}} < 0.05$ ; FDR-corrected). The stronger spike-field coupling in the fast theta  
240 band for hits compared to misses was also found to be significant when using sessions (T-test;  
 $t_{20} = 3.25$ ;  $p < 0.005$ ) as random variable. No significant differences between hits and misses were  
obtained for locally coupled spike-field pairs.

Like the memory related difference in gamma peak frequency, a shift in peak frequency also drove  
the memory-related difference in distal theta spike-field coupling. This was confirmed by a peak  
245 detection analysis showing that hits exhibited a slightly faster peak in theta spike-field coupling  
compared to misses (T-test;  $t_{206} = 3.49$ ;  $p < 0.0001$ ; Figure 3D). This effect is shown for one example  
single-unit which is distally coupled to a slow theta oscillation for misses, and to a fast theta  
oscillation for hits (see Figure S5A for control analysis on selection bias). As for gamma, control  
analyses addressing concerns about non-stationarity of the signal and the existence of meaningful  
250 theta power in the phase providing LFP signal are shown in Fig. S6-S8. Like the effects in local  
gamma coupling these effects are unlikely to be due to changes in stimulus evoked activity (Fig.  
S2-S3), and/or due to theta rhythmicity in the spiking of neurons themselves (Fig. S9).

To assess the direction of information flow of distal theta spike-LFP coupling, and to test whether  
this flow of information has any bearing on memory performance, we compared the Phase Slope  
255 Index (PSI) between hits and misses. Positive values indicate that the spike providing signal is the  
sender and the LFP providing signal is the receiver and vice versa. The results indicate above  
chance PSIs for hits peaking in the fast theta band (7-8 Hz). In addition, hits show significantly  
higher PSIs compared to misses (Fig. 4), whereas PSIs for misses do not differ from zero.

260 In agreement with the results obtained for local gamma oscillations we observed that distal theta  
 spike-LFP coupling varied as a function of memory formation, with hits showing spike coupling  
 at faster theta peak frequencies compared to misses. Thus, the present findings reveal two distinct  
 cell populations that synchronize either to local gamma rhythms or distal theta rhythms, and a  
 functional relationship between the peak frequency of gamma and theta phase coupling and  
 265 memory formation. Importantly, directional coupling analyses demonstrate that the spike  
 providing signal is the upstream sender and the LFP providing signal is the downstream receiver.  
 This result likely does not indicate that one single neuron can drive the entire LFP in a receiving  
 region. Instead, it likely indicates that the spikes of a large population of neurons, of which we  
 happen to sample one, provide input to a receiving region. This direction of information flow was  
 dependent on memory success, suggesting that successful memory formation correlates with  
 270 efficient cross-regional information transfer.

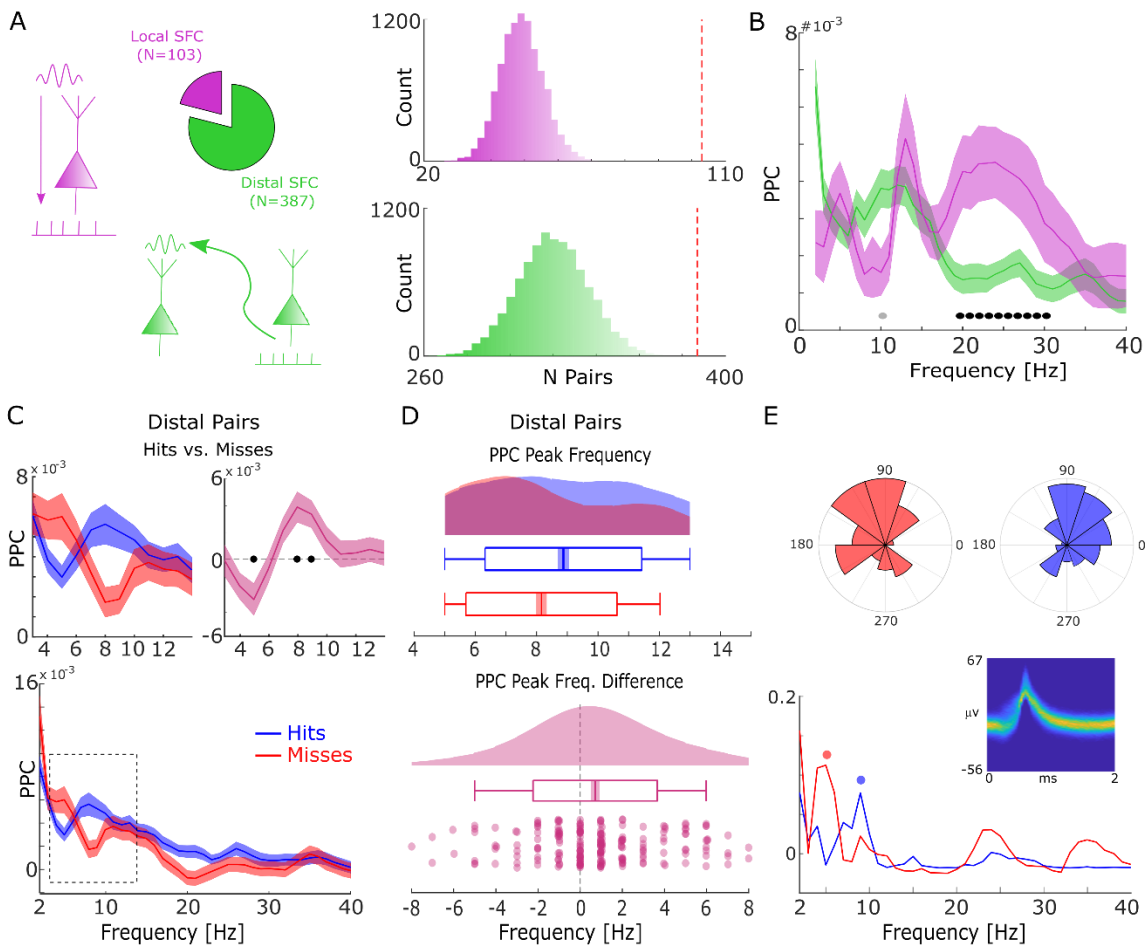

**Figure 3. Spike-field coupling results for the lower frequencies.** (A) Number of significant ( $p_{\text{corr}} < 0.05$ ) locally (pink) and distally (green) coupled spike-field pairs are shown. The histograms on the right show the results of a randomization procedure testing, with the red dashed line indicating the empirically observed value. (B) PPC is plotted for local and distal spike-field pairs. Black circles indicate significant differences ( $p_{\text{corr}} < 0.05$ ). Grey circles indicate trends ( $p_{\text{uncorr}} < 0.05$ ). Shaded areas indicate standard error of the mean. (C) PPC is shown separately for hits (blue) and

275



misses (red), and for the difference between the two conditions (magenta) for distally coupled spike-field pairs. The top panels show PPC values for the theta frequency range, the bottom panel shows all frequencies up to 40 Hz. Shaded areas indicate standard error of the mean. Black circles indicate significant differences ( $p_{\text{corr}} < 0.05$ ). (D) Peak frequency in PPC across all distal spike-field pairs is shown for hits and misses (top), and for the difference (hits-misses). Box plots indicate the same indices as in Fig 2D. (E) Distal theta spike-field coupling is shown for one example single-unit recorded from the left posterior hippocampus, and the LFP recorded from the left entorhinal cortex. Phase histograms on top indicate phase distribution for hits at 9 Hz (blue) and misses at 5 Hz (red). Spike wave shapes on the right are plotted by means of a 2D histogram.

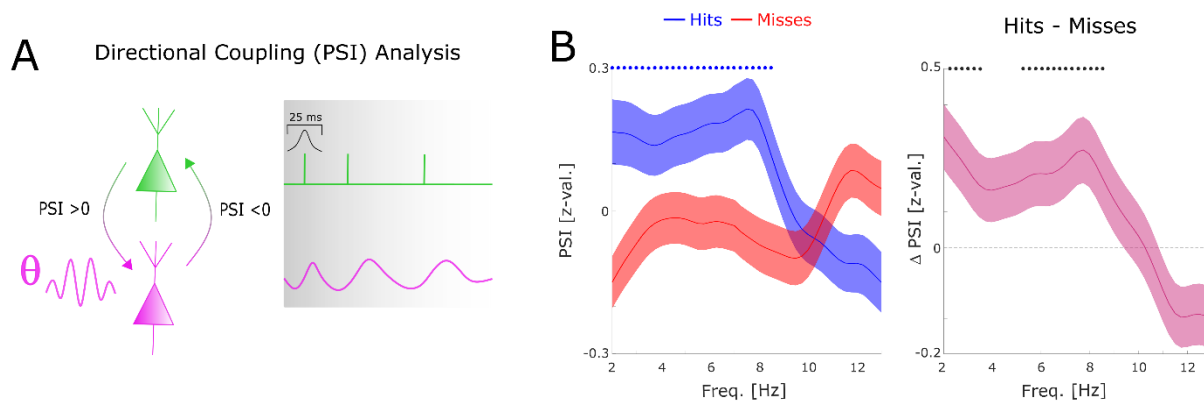

**Figure 4. Directional coupling analysis of distal spike-LFP coupling using Phase Slope Index (PSI).**

A) A schematic of the analysis is shown. Spike time series were convolved with a Gaussian window, and the PSI was calculated between the spike time series (green) and the distally coupled LFP (pink). B) The left plot shows normalized PSI (i.e., z-values) for hits (blue) and misses (red). Hits show significantly positive PSIs throughout the theta frequency range, peaking at ~8 Hz (blue circles;  $p_{\text{corr}} < 0.05$ ). The right plot shows the difference in PSI between hits and misses. Hits show significantly higher PSIs compared to misses, especially in the high theta range (black circles;  $p_{\text{corr}} < 0.05$ ).

### Theta and gamma oscillations are coupled for hits but not for misses

The above results show that successful memory formation relies on gamma oscillations synchronizing neurons at a local level, and theta oscillations at ~8 Hz synchronizing neurons across regions. Intriguingly, peak frequencies of both oscillations showed a similar relationship with memory formation, with faster frequencies being associated with successful memory. This raises the question of whether gamma and theta oscillations are also temporally coordinated. For this analysis we considered electrodes from regions where the LFP was locally coupled to spikes in the gamma range and distally coupled to spikes in the low frequency (theta) range. More than half of the electrodes (58%) were available for this analysis (Figure 5A). Cross-frequency coupling was calculated by means of phase-amplitude coupling using the modulation index (31). Importantly, theta and gamma frequencies were adjusted to their peak frequency (see methods) for each condition to account for the systematic difference in peak frequencies between hits and misses and to ensure the presence of a physiologically meaningful oscillation in both conditions (32)(see also Fig. S8). Theta phase to gamma power coupling was evident in single trials (Figure 5B-C). Hits showed stronger theta phase to gamma amplitude coupling compared to misses (Figure 5D; Wilcoxon test;  $z=3.7$ ;  $p < 0.00001$ ). This increased cross-frequency coupling for hits compared to misses was also significant when pooling the data across sessions (Wilcoxon test;  $p < 0.05$ ). Cross-frequency coupling can be subject to several confounds, which we addressed by a series of control analyses (see Methods and Fig. S10).

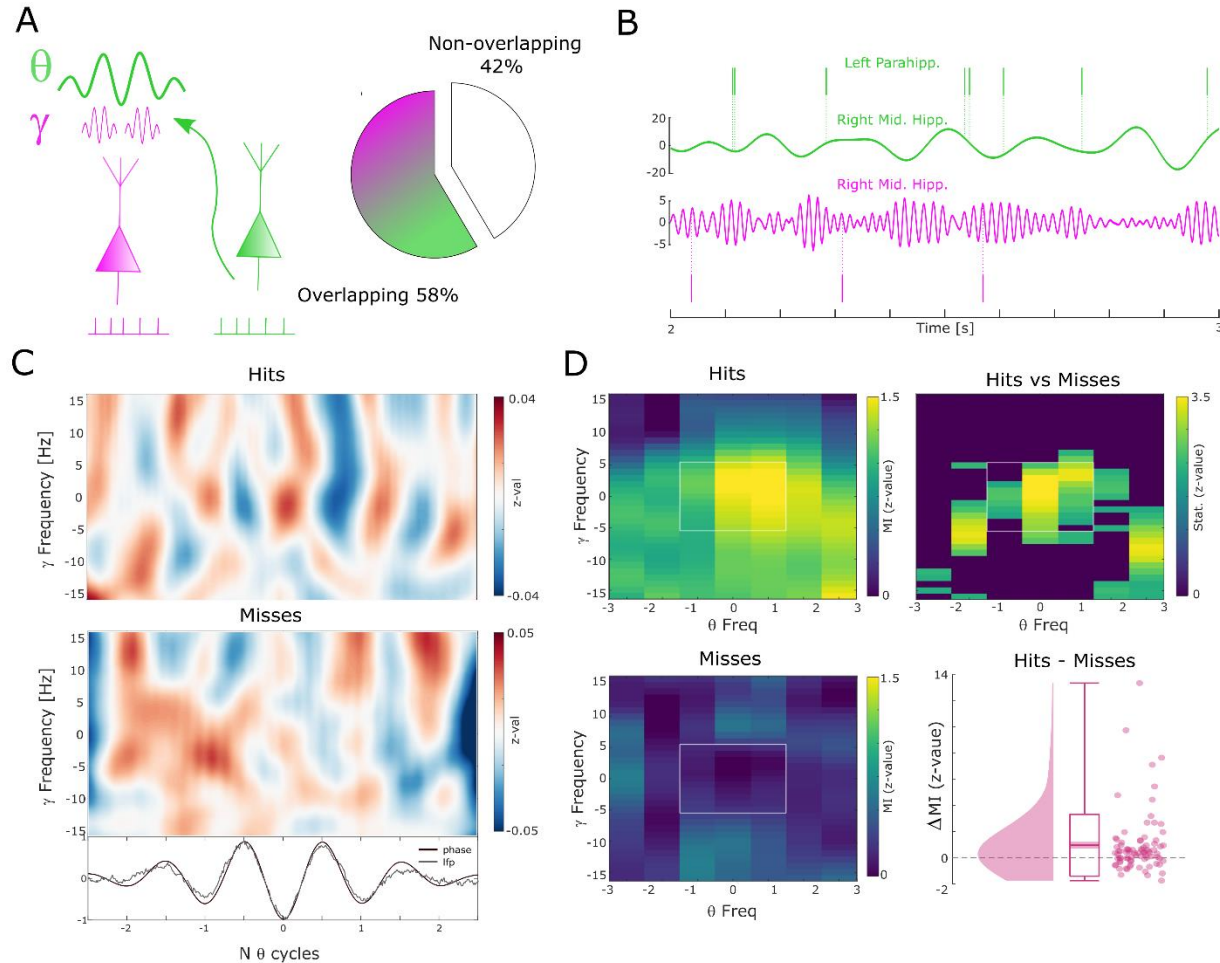

**Figure 5. Theta to gamma cross frequency coupling results.** (A) Percentage of overlapping local gamma (pink) and distal theta (green) spike-field pairs are shown. (B) Spikes and band-pass filtered LFP data for one example single trial are shown. The top row shows spikes from a multi-unit in the left parahippocampal cortex which are coupled to the LFP in the right middle hippocampus (green). The gamma LFP from the same region (right mid hippocampus) is shown below (pink) as well as spikes from a multi-unit in the same region that is coupled to this gamma oscillation. Note the gamma power increase around theta troughs. (C) Theta phase sorted gamma power (y-axis centered to gamma peak frequency) is shown for all trials for the data shown in (B). The bottom panel shows averaged normalized band-pass filtered LFP data (black) and unfiltered LFP data (grey). (D) Co-modulograms are shown for hits and misses. Modulations indices(31), which indicate the strength of cross-frequency coupling, are plotted in terms of z-values where means and standard deviations were obtained from a trial shuffling procedure. The difference between hits and misses is shown as z-values obtained from a non-parametric Wilcoxon signrank test masked with  $p_{\text{corr}} < 0.05$  (FDR-corrected). The panel in the bottom right shows the individual differences between hits and misses across the whole dataset (N=83 pairs).

### Short co-firing latencies predict successful memory formation

One effect of the relative frequency increase of theta/gamma oscillations may be a more efficient transmission of information between neural assemblies. This can be demonstrated by considering two neurons which both have the same preferred phase of firing (e.g. maximal excitation), and which are both coupled by an oscillation with a constant phase lag of  $\pi/4$  (with neuron 1 leading and neuron 2 lagging). If the two neurons are coupled at a frequency of 8 Hz, then neuron 2 would fire ~31 milliseconds after neuron 1 (i.e., 8 Hz equals a period length of 125 ms, divided by 4 =

335 31.25). If the neurons are, however, coupled at 4 Hz then neuron 2 would fire ~62 milliseconds  
after neuron 1. To test this hypothesis, we analyzed neural co-firing at different time lags by  
computing the cross-correlation of spike trains between theta up-stream single-/multi-units (i.e.,  
the distally coupled unit) and their corresponding gamma down-stream single-/multi-unit (i.e., the  
locally coupled unit; Figure 6A). Overall, 32 pairs were available for this analysis, 24 of which  
340 showed above threshold co-firing (see Table S1 for detailed information about each pair). Cross-  
correlations for hits and misses were each compared to a trial-shuffled baseline and transformed  
to z-scores effectively eliminating biases introduced by different trial numbers.

Compared to baseline, hits showed significant above chance co-firing at lags 20-40ms, whereas  
co-incidences for misses peaked at 60 ms (T-test;  $p_{\text{corr}} < 0.05$ ; FDR-correction; Figure 6B). In  
345 addition, hits showed stronger co-firing compared to misses at 20 ms (T-test;  $p_{\text{corr}} < 0.05$ ; FDR-  
correction; Figure 6B). A peak detection analysis revealed that co-firing for hits peaked  
significantly earlier compared to misses ( $t_{21} = -3.2$ ;  $p < 0.005$ ; Figure 6D). This result held also when  
using a more conservative approach, i.e., pooling the data across number of single-/multi-units  
( $t_{11} = -3.34$ ;  $p < 0.01$ ). Intriguingly, this memory related co-firing effect was observed only when  
350 selecting pairs of single-/multi-units that were both locally coupled to gamma, and distally coupled  
to theta. Analyzing all possible pairs of distally coupled theta units showed no differences in peak  
co-incidences between hits and misses ( $t_{126} = -0.78$ ;  $p > 0.4$ ). This is quite remarkable given that  
statistical power for this latter analysis was substantially higher. This pattern of results suggests  
that the coupling of down-stream neurons to local fast gamma oscillations is crucial for observing  
355 the memory dependent effect of co-firing at critical time windows. To test for a similar effect in  
the reverse direction (i.e., local gamma coupled unit --> distal theta coupled unit) the same co-  
incidence analysis was carried out for negative lags. Intriguingly, misses showed peak co-firings  
at shorter negative latencies (i.e., closer to 0) compared to hits (Fig. S11;  $t_{20} = -2.82$ ;  $p < 0.05$ ). This  
result is consistent with the STDP framework, whereby a negative time lag leads to a decrease of  
360 synaptic connectivity (5, 6)

Together, these results suggest that successful memory formation correlates with shorter latencies  
of co-firing between down-stream and up-stream neurons. Notably, this effect is selective for pairs  
of single-/multi-units that are both distally theta coupled and locally gamma coupled.

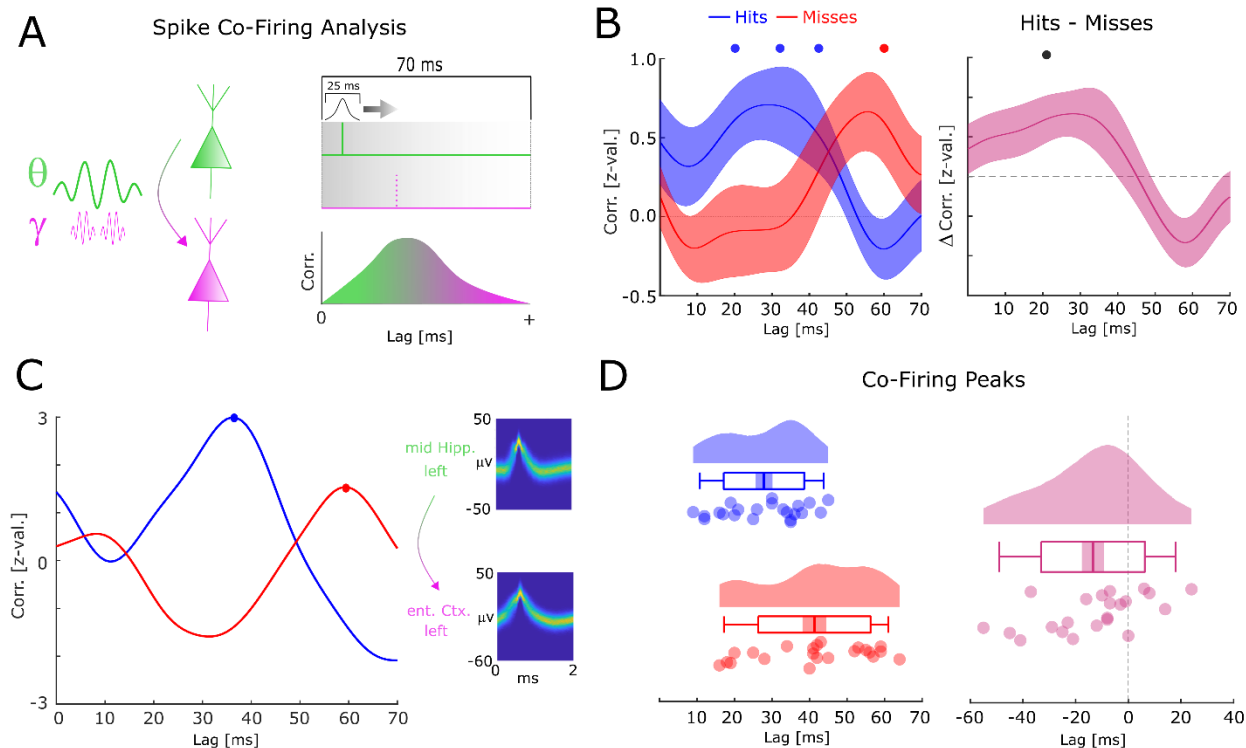

365 **Figure 6. Co-firing analysis results for theta-gamma coupled assemblies.** (A) A schematic of the co-firing analysis is shown. Pairs of putative up-stream (green) and putative down-stream (pink) units were selected for the co-firing analysis. Co-firing was measured by cross-correlating spike time series (convolved with a Gaussian envelope). Cross-correlations indicate the latency of firing of a putative down-stream neuron (pink) in response to a putative up-stream neuron (green). (B) Spike cross-correlations for hits and misses are plotted in terms of z-values derived from a trial shuffling procedure. Hits (blue) show increased co-firing between putative up-stream and putative down-stream neurons at around 20-40 ms ( $p_{\text{corr}} < 0.05$ ), whereas misses (red) peak at 60 ms ( $p_{\text{corr}} < 0.05$ ). Shaded areas indicate standard error of the mean. Differences between co-firing of hits and misses is plotted on the right. Hits show higher co-firing at 20 ms compared to misses ( $p_{\text{corr}} < 0.05$ ). (C) Co-firing data is shown for one example pair of units. (D) Results of the co-firing peak detection analysis. The distribution of the peak lag is shown for hits (blue) and misses (red), and for the difference for each pair of neurons (pink). Hits exhibit significantly shorter lags of co-firing compared to misses ( $p < 0.005$ ).

370

375

## Discussion

380 We investigated neural firing, spike-LFP coupling and co-firing of single-/multi-units during the early encoding stage of complex associations into episodic memory. Our results demonstrate that successful memory formation during this early stage is correlated with a fine-grained pattern of local and distal neural synchronization reflected predominantly in theta and gamma oscillations. On a local level, neural firing coupled to relatively fast gamma oscillations predicts memory success, whereas coupling to relatively slower gamma oscillations predicts memory errors. A similar relationship was obtained on a distal level (i.e., spikes and LFPs recorded from different electrodes) where coupling at relatively faster theta oscillations occurred during hits and coupling at relatively slower theta oscillations was observed during misses. Directional connectivity

385

analyses suggested that the single-/multi-units were the up-stream sender and the LFP the down-stream receiver. Furthermore, gamma oscillations were coupled to the phase of theta, particularly for hits but not for misses, suggesting that successful memory formation is related to the coordination between the two oscillations. Finally, and most crucially, we found that the co-firing of pairs of single-/multi-units was correlated with memory formation such that co-firing at short but not long latencies predicted successful memory. These findings link theta and gamma oscillatory dynamics to neural firing and are consistent with current theories that emphasize the role of oscillations for synchronizing neural assemblies to support memory processes (1, 9, 12, 15).

Enhanced local spike-LFP coupling for later successfully recognized pictures in the high gamma but not low gamma band has been observed in the hippocampal formation of macaques (17). We replicate this finding here in humans with an associative episodic memory task. However, in contrast to this previous study we observed a shift in the peak gamma frequency rather than just an increase in spike-LFP coupling which could be due to differences in the task requirements, recording location, analysis techniques or species-specific differences. Other studies in rodents have identified different roles for fast vs slow gamma oscillations in the hippocampus, with fast gamma oscillations reflecting the routing of information into the hippocampus and slow gamma oscillations reflecting the routing of information out of the hippocampus (20). Consistent results were obtained in humans showing that fast gamma oscillations positively predict encoding, whereas slow gamma oscillations positively predict retrieval of memories (21). Our results are consistent with these studies in suggesting that relatively fast gamma oscillations, but not slow gamma oscillations, are beneficial for memory encoding, and demonstrate this phenomenon on level of spike-LFP coupling. As suggested in theoretical papers (9, 12) the coupling of spikes at fast gamma oscillations may support memory formation because of the precise temporal packaging that it entails. Such tighter temporal compression of spikes increases the chances of an up-stream neural assembly to drive their down-stream partners (9). Indeed, this was observed in the co-firing analysis where we found shorter co-firing lags for successful memory trials compared to unsuccessful memory trials. To this end, our results are consistent with the idea that fast gamma oscillations correlate with more efficient neural communication, therefore supporting memory formation processes. However, it must be acknowledged that our results do not show a direct correlation between gamma oscillations and the lag of co-firing, let alone a causal role of fast gamma oscillations for short latency co-firing. Such relationships should be investigated in future studies.

Paralleling the results for local gamma spike-LFP coupling a frequency shift was also observed for distal theta spike-LFP couplings. Here, coupling at relatively faster theta oscillations correlated with later memory success, whereas coupling at relatively slower theta oscillations correlated with memory errors. Dissociations between slow and fast theta oscillations in humans have been reported previously (33, 34), albeit slow theta in these studies was considerably slower than reported here (i.e., ~2-4 Hz as opposed to 4-6 Hz). Therefore, the relatively slower theta reported in the current experiment may not reflect this classic slow theta frequency band (35). Instead, they may reflect frequency differences of spike-LFP coupling within the faster theta (4-10 Hz) band which may change as a function of cognitive states, such as memory outcome. It is well documented that the frequency of theta correlates positively with running speed in rodents (36) and humans (34), and that running-speed induced changes correlate with memory outcome (37). A recent theoretical paper speculated that variations in running speed in rodents may reflect

435 different levels in excitatory input to the hippocampal system, which in humans can be equated  
with attention (38). It is therefore conceivable that the frequency of theta is subject to modulation  
of the level of excitation or cognitive states which correlate with memory outcome. On a functional  
level, an increase of frequency in theta spike-LFP coupling could have the same role on neural  
signal transmission as observed for gamma, i.e., enhancing the likelihood of an up-stream sender  
440 to drive their down-stream partners by temporal compression of spikes. Consistent with this  
interpretation increased directional coupling from spikes to LFPs was observed for theta for  
successful memory trials (Fig. 4). This result is in line with previous studies demonstrating a  
crucial role of inter-areal theta phase synchronization for memory formation (3). However, no  
attempt was made here to anatomically group long-range connectivity by hippocampal subfields  
or layers due to difficulties in asserting the exact locations of microwires. Instead, connectivity  
445 patterns between spike providing and LFP providing electrodes were analysed in a purely data-  
driven way. This is a limitation that should be addressed by future studies using sophisticated  
localization techniques.

Theta and gamma oscillations not only showed parallel relationships between spike-LFP frequency  
and memory, but also demonstrated cross-frequency phase-to-amplitude coupling. Gamma  
amplitude co-fluctuated with theta phase with the degree of this cross-frequency coupling being  
450 positively related to memory (i.e., stronger theta-gamma coupling for hits compared to misses).  
This result is in line with a previous study reporting similar results (19) and extends these findings  
to microwire recordings and links it with spike-LFP coupling. Furthermore, this result shows that  
the amplitude of local gamma oscillations rhythmically synchronizes to the phase of theta which  
mediates neural synchrony between regions, particularly if memory formation is successful. This  
455 result is consistent with current network models where fast oscillations regulate local connectivity,  
slower oscillations regulate long-range connectivity, and cross-frequency coupling enables  
efficient interfacing between the local gamma and the long-range theta networks (39-41).

The net result of a tighter synchronization of spikes locally at gamma, distally at theta, and  
increased synchronization between theta and gamma, is likely to be increased efficiency in neural  
460 communication. One way to quantify the efficiency of neural communication is to measure the  
time it takes for an up-stream neural assembly to drive their down-stream partners. Indeed, we  
observed that co-firing between neurons occurred at earlier lags for successful memory trials  
compared to erroneous memory trials. On a synaptic level such co-firing at earlier lags would lead  
to a strengthening of synaptic connections with the amount of strengthening decaying  
465 exponentially with the lag – known as spike-timing-dependent-plasticity (6). These results are  
consistent with previous findings (22) and support the idea that oscillations play a crucial role for  
memory formation because they enable efficient signal transmission and thereby affect synaptic  
plasticity (1, 9, 12).

Our study also has several limitations and caveats that need to be considered when interpreting the  
470 results. First, sample size of patients is relatively low (N=9), however, not unprecedented in the  
field; a seminal study showing increased theta phase coupling of neural firing for later successfully  
remembered items reported 9 patients and 14 sessions (16). To offset the low N in patients several  
sessions were carried out per patient yielding 40 sessions overall. Second, single-units and multi-  
units were analyzed together. This was necessary because of the limited number of recorded single-  
475 units. Therefore, we cannot disambiguate between synchronization of neural populations or  
individual neurons, which is particularly relevant for the co-firing analysis. As a result, we cannot  
infer whether the observed oscillations co-occur with synchronized firing of pairs of individual

neurons, or synchronized firing between cell assemblies. Third, all effects reported here were observed in a relatively early time window, i.e., the first second after the stimuli appeared on the screen (2-3 seconds after cue-onset; see Fig. 1A). This analysis window was chosen because it reflects the earliest possible time point when memory formation can happen, i.e., when the full information of the memory is presented. This might indicate that the observed differences between correct and erroneous memory trials reflect initial memory processing steps such as the routing of information into the appropriate MTL regions. However, the observed synchronization processes may be less reflective of the actual binding process per se, linking the stimuli into a coherent memory trace which supposedly happen at later processing stages (18). Further experiments are needed to address these issues in detail.

## Materials and Methods

### Patients

Nine patients with refractory epilepsy volunteered to participate in the experiments. Mean age of patients was 37 years (s.d.: 9.1; range: 26-53). All but two patients were right-handed. On average patients suffered 15.6 years from epilepsy. All patients had temporal lobe epilepsy with either a left (N=3), right (N=3) or bilateral focus (N=3). Each patient participated in at least one experimental session, and in most cases more than one session such that overall data from 40 sessions was available for analysis.

Patients were treated in one of three hospitals, the Queen Elizabeth University Hospital Birmingham (N=6), the Epilepsy Centre at the University Hospital in Erlangen (N=1), or the Vrije Universiteit Medisch Centrum Amsterdam (N=2). Ethical approvals were given by National Research Ethics Service (NRES), Research Ethics Committee (Nr. 15/WM/0219), the ethical review board of the Friedrich-Alexander Universität Erlangen-Nürnberg (Nr. 124\_12 B), and the Medical Ethical Review board of the Vrije Universiteit Medisch Centrum (Nr. NL55554.029.15), for Birmingham, Erlangen and Amsterdam respectively.

### Task and procedure

All participants completed at least one session of an associative episodic memory task which required patients to form trial unique associations between three images (Figure 1A). In one session, several blocks of the memory task were carried out. One block comprised of three phases, an encoding phase, a distractor phase and a recall phase. During encoding, participants were first presented with an image cue of an animal for 2 seconds, followed by a pair of 2 images made up of any combination of a well-known face or a well-known place (i.e., face–place, face–face, or place–place pairs; presented for 2 s). The initial number of trials was set according to the patient's cognitive abilities as estimated by the experimenter. This number was then reduced if the hit rate fell below 66.25%, or increased if the hit rate surpassed 73.75%, effectively adjusting task difficulty according to the participant's ability. On average, participants completed 19.1 trials (S.D.: 10.3; range: 2-82) per block. Participants were asked to vividly associate these triplets of images. Participants were encouraged to make up a story, which would link the three images to help them memorize the associations. For each triplet, participants were asked whether the story they came up with (or combination of pictures) was plausible or implausible. This plausibility

525 judgment was used to keep participants on task rather than to yield a meaningful metric. Participants were self-paced in providing a judgment, and the following trial began immediately afterward. After encoding, the distractor phase was carried out which required participants to make odd/even judgments for 15 sequentially presented random integers, ranging from 1 to 99. Feedback was given after every trial. After completion of the distractor task, the retrieval phase commenced. Participants were presented with every animal image cue that was presented in the earlier encoding stage and, 2 s later, were asked how many of the associated face or place images they remembered (participants had the option of responding with 0, 1, or 2). If the participant remembered at least 1  
530 image, they were then asked to select the pair of images from a panel of 4 images shown during the previous encoding block (2 targets and 2 foils). Foils were drawn from images, which were also presented in the preceding encoding phase but were paired with a different animal cue. Therefore, a given association could either be remembered completely (i.e., both images correctly identified), remembered partially (i.e., only one image correctly identified), or fully forgotten (i.e.,  
535 no image recalled or both incorrect).

Notably, the chance level in this task is 16.6%, and not 50% as one might initially assume. This is because the participant selects two stimuli out of 4 in two sequential steps. The chance of getting the first stimulus correct is 50% (i.e., 2 out of 4). The chance of getting the second stimulus also  
540 correct is 33% (i.e., 1 out of 3). The combined probability for both choices being correct therefore is  $0.5 * 0.3 = 0.166$  or 16.67%. Similarly, the chance of getting both stimuli incorrect is also 16.67%. Getting one stimulus correct is the most probable outcome with a likelihood of 66.67%. Therefore, partial hits/misses (i.e., 1 correct, 1 incorrect) are likely to also contain a high proportion of lucky guesses. Partial hits/misses and full misses were combined into one miss category.  
545 Participants were self-paced during the recall stage, though the experiment ended after a runtime of 40 min in total. All participants completed the task on a laptop brought to their bedside.

## Recording Data

550 To record behavioural responses and to present instructions and stimuli, a Toshiba Tecra laptop (15.6 inch screen) was used in the hospitals in Birmingham and Erlangen. In Amsterdam, an ASUS laptop was used (15.6 inch screen). All laptops operated on Windows 7, 64-Bit. Psychophysics Toolbox Version 3 (42) was used with MATLAB 2014 or MATLAB 2009b (Amsterdam). For responses, the following buttons were used: up-down-left-right arrows to select the images during  
555 the recall phase, and the 'End' key on the Numpad was used to confirm the selection. During encoding the 'up' and 'down' arrow keys were used to give the plausible/improbable ratings, respectively. During the distractor phase the 'left' and 'right' arrow keys were used to give the odd/even judgements, respectively.

560 Electrophysiological data were recorded from Behnke-Fried hybrid micro-macro electrodes (Ad-Tech Medical Instrument Corporation, Oak Creek, WI). Each Behnke-Fried hybrid electrode contained 8 platinum-iridium high impedance microwires with a diameter of 38  $\mu\text{m}$ , and one low impedance microwire with the same diameter extending from the tip. Different referencing schemes were used across the hospitals/patients in order to yield the best signal-to-noise ratio in  
565 the different environments (i.e., yield highest number of visible spikes in raw data). For 5 patients the high-impedance contacts were referenced against either a low-impedance microwire or macro-contact, thus yielding a more global signal. For the remaining 4 patients high-impedance contacts



were referenced against another “silent” (i.e., containing no visually detectable spikes) high impedance wire, thus yielding a more local signal. As part of the pre-processing data were re-referenced to yield a comparable local referencing scheme across all datasets (see below). The data were recorded continuously throughout the experiment on an ATLAS Neurophysiology system (Neuralynx Inc.) with a sampling rate of 32 kHz (Birmingham and Amsterdam) or 32.768 kHz (Erlangen) and stored as a raw signal for processing and analysis.

## Data Analysis

The code used for data analysis is available at <https://osf.io/fngz8/>.

**Behaviour:** Neural activity during the encoding phase was separated into hits and misses according to memory performance in the subsequent recall phase. Hits constitute trials where both items were later correctly retrieved (i.e., complete memory); Misses constitute trials where at least one item was remembered incorrectly or where the patient indicated that they did not remember any item (i.e., incomplete memories or fully forgotten). Reaction times of the plausibility ratings indicate the time from onset of the cue (i.e., animal image) to the button press and were calculated per subject by using the median across trials. Reaction times were 15.01 seconds on average (s.d. 5.79) for hits and 15.26 seconds misses (s.d. 6.85) and did not differ significantly ( $t_8=0.44$ ;  $p>0.5$ ).

**Electrode localization:** Electrodes were localized for using one of the following procedures. For patients recorded in Birmingham and Erlangen, pre- and post-implantation T1 structural MRIs (MP-Rage) were co-registered and normalized to MNI space using SPM8 (<https://www.fil.ion.ucl.ac.uk/spm/software/spm8/>). If both scans were available the normalization parameters were estimated on the pre-implantation MRI, and these parameters were then applied on the post-implantation MRI. For two patients, only the post implantation MRI was available. For these two patients normalization parameters were estimated and applied to this post implantation MRI. The location of the microwire bundle was either clearly visible as an image artifact in the post implantation MRI. If not, then the location of the microwire bundle was inferred visually by extrapolating the electrode trajectory by 5 millimetres.

For patients recorded in Amsterdam pre-implantation structural T1 scans and post-implantation CT scans were available. These were overlaid and normalized using the same procedure as described above using SPM8. The microwire contacts were clearly visible in the CT scans, therefore the location could be estimated directly in all cases.

**Spike Sorting:** Spikes of recorded neurons were extracted offline from high-frequency activity (500Hz-5kHz). Spike detection and sorting was done using Wave\_clus (43). All units with at least 50 spikes in either condition (hits, misses), a mean spike count  $> 2$  and mean firing rate  $> 1$  Hz during the encoding period (0-4s) were submitted to further analysis. The resulting units were further visually inspected to reject noise based on waveshape, spike distribution across trials, and inter-spike intervals. Across all patients and sessions 218 units were retained for analysis. As a final step units were classified into single-units and multi-units following an automatic procedure developed by Tankus et al. (23), which has been shown to closely match classification of trained researchers. This algorithm uses two criteria to classify units, which are inter-spike intervals (ISIs) and variability of the spike waveshape. Concerning the first criterion, a given unit is classified as a multi-unit if more than 1% of ISIs are smaller than 3ms (which would violate the refractory

615 period of firing of neurons). For the second criterion, the variability of the spike waveshape is  
computed in the time window of the rising flank of the spike waveshape (see Figure S1B). The  
end of the rise time was the peak of the spike waveshape. The beginning of the rise time was  
estimated following the procedure described in Tankus et al. (23) using the time-point of the  
maximum curvature (i.e., second derivative) within an area at the start of the spike wave-shape.  
620 Spike waveshape variability (i.e., criterion 2) was then calculated by dividing the sum of the  
standard deviation by the height of the spike wave.

$$c2 = \frac{\sum_i^j s(t_i)}{m(t_j) - m(t_i)}$$

625 Where  $i$  = start of the rise time and  $j$  = end of the rise time, and  $m$  = voltage at time  $t$ . This second  
criterion,  $c2$ , can be understood as the inverse of the signal-to-noise ratio where a low value means  
low variability in spike waveshape. Following Tankus et al. (23) we labelled a given unit as a SU  
if  $c2$  was  $< 3$ . The distribution of both criteria across all units is shown in Figure S1A; waveshapes  
and ISIs for representative SUs and MUs are shown in Figure S1C.

630 Firing Rate and Spike Density: Time stamps of spikes during the encoding phase were extracted  
and converted to continuous time series containing 0s (no spike) and 1s (spike) at a sampling rate  
of 1kHz. These time series were cut into trials with a duration of 14 seconds centred to cue onset  
(i.e., animal image), starting at -7 seconds. These trial-based spike time series were then convolved  
635 with a gaussian window of 250 ms length to yield spike density time series per trial. These trial-  
based time series were averaged separately for hits and misses. Finally, a normalization procedure  
according to (44) was carried out to account for the vast variability of firing rates between neurons  
(some neurons fire very sparsely whereas other fire at a very high rate). Normalized firing density  
was calculated according to the formula below, where  $z(t)$  = normalized firing rate,  $sd(t)$  = spike  
640 density,  $\mu(bl)$  = mean spike density in baseline interval,  $\sigma(bl)$  = standard deviation of spike density  
in baseline interval, and  $\lambda$  = regularization parameter (set to 0.1; see (44)). This regularization  
parameter was necessary to avoid extreme values for cases where no or only few spikes were  
present in the baseline. The baseline interval was set to -1000 ms to -125 ms (i.e., half of the  
Gaussian window length).

$$645 \quad z(t) = \frac{sd(t) - \mu(bl)}{\sigma(bl) + \lambda}$$

LFP pre-processing: The continuous raw data was imported using the Neuralynx data reader  
provided by U. Rutishauser (7<sup>th</sup> release, <https://www.urut.ch/new/serendipity/index.php?/pages/nlxtomatlab.html>). A Butterworth low-  
650 pass filter was applied (filter order 2) at 300 Hz. In some channels/sessions an artifact from the  
TTL pulse was visible, which was removed by subtracting the average artefact from the single trial  
using a linear regression. Spikes were removed by linearly interpolating the signal from 2 ms  
before the spike to 6 ms after the spike (45). Line noise at 50 Hz was removed using a template  
subtraction method. This method estimates the line noise signal by fitting a sinusoid at noise  
655 frequency and then subtracting it from the signal. Because the line noise can be assumed to be  
stationary (whereas brain signals are not stationary) this approach effectively removes line noise

whilst retaining physiological activity. This approach is therefore preferable to a band-stop filter, which does not retain physiological activity at line noise frequency. Finally, the continuous LFP data was segmented into epochs of 14 seconds duration centred at cue onset during encoding (i.e., animal image), downsampled to 1 khz using Fieldtrip (46), and stored for further analysis.

The LFP data was cleaned from artefacts and re-referenced as follows. For artefact rejection a two-step procedure was carried out which first identified noisy channels, and then noisy trials. To reject noisy channels the root mean square amplitude (RMSA) in the time window of interest (-0.5 to 5 seconds around cue onset) was calculated for each channel and z-transformed (where the mean and standard deviation were obtained across channels). Channels with a z-value above 3 were rejected. On the trial level, a similar procedure was carried out on those channels retained after the first step. The RMSA was averaged in the time window of interest (-0.5 to 5 seconds) and z-transformed across trials. Trials with a z-value of over 4 were rejected. Furthermore, z-scores were calculated for the raw amplitude. Trials with a maximum raw amplitude z-score of above 4 were also rejected. Lastly, only channels with a minimum of 25 remaining trials were submitted to further analysis.

Finally, the data were re-referenced to yield a comparable signal across patients and to extract the field potential on a very local level. To this end each microwire channel was re-referenced to the mean amplitude of its neighbouring microwire channels (i.e., wires on the same bundle). Bundle refers to the 8 high-impedance contacts within one Behnke-Fried hybrid electrode. Instead of simply subtracting the average signal, however, we used an orthonormalization procedure termed Gram-Schmidt Correction (see [https://en.wikipedia.org/wiki/Gram-Schmidt\\_process](https://en.wikipedia.org/wiki/Gram-Schmidt_process)). This procedure projects two signals into a sub-space where both signals don't share any variance, i.e., they are orthonormal to each other (their sum = 0). This is an effective way of subtracting those parts of a signal, which are shared between an individual channel and its neighbours (such as volume conduction; see (47)). Furthermore, by only subtracting those parts of the signal that are shared between the two sources this method is less prone to introducing noise from the reference into the referenced channel.

**Spike Field Coupling:** The following procedure was used to calculate spike field coupling (SFC) and to assess differences in SFC between hits and misses. As an overview, this procedure calculated spike field couplings for every possible pairing of units (spikes) and LFP channel. Therefore, a given pairing could either constitute coupling at the local level (i.e., spike and LFP come from the same channel, or from the same bundle), or coupling at a distal level (i.e., spike and LFP come from different bundles; see Figure 2 and 3). Each pair was first tested for significant spike field coupling and then submitted to further analysis to compare SFC between hits and misses.

As a first step, phase was calculated using Fieldtrip. Different parameters were used for low (2-40 Hz) and high frequency ranges (40-80 Hz); i.e., using a 6-cycle wavelet for low frequencies in steps of 1 Hz and a 12-cycle wavelet for high frequencies in steps of 2 Hz. In addition, for high frequencies only the first derivative was taken before calculating phase. Phases at spike times were extracted and split according to whether they occurred the time window of interest, which was 1 second after the face/place stimuli were shown (2 – 3 seconds after Cue onset). If at least 30 spikes were available, then the data was admitted to the next step. For a given spike-LFP pair a Raleigh test using the Circ\_Stat Toolbox (<http://www.jstatsoft.org/v31/i10>) was calculated at each frequency to assess whether phase distributions were different from a uniform distribution. An FDR correction (48) was applied to correct for multiple comparisons across frequencies. If this

corrected p-value was below 0.05 then the spike-LFP pair was submitted to the next step. In this step, pairwise phase consistency was calculated for three conditions, (i) across all trials (hits and misses together), (ii) only for hits (i.e., later completely remembered trials), and (iii) only for misses (i.e., partially remembered and fully forgotten trials).

To statistically assess whether the number of significant spike – LFP couplings identified in the above procedure was above chance a randomization test was carried out. This test was run separately for locally coupled and distally coupled spike – LFP pairs. To this end, trials for the spike providing data and phase (i.e., LFP) providing data were shuffled. All other parameters (including number of hit and miss trials) were held constant. These shuffled data were then subjected to the same Raleigh test (FDR corrected) as above. For each possible spike-LFP pair 100 such shuffled tests were carried out and the data was stored. From these shuffled data a distribution of the number of ‘significant’ spike-LFP pairs (i.e., Raleigh test  $p < 0.05$ ; FDR corrected) was generated by drawing 10000 samples, counting the number of significant spike-LFP pairs for each sample.

To extract the peak frequency of spike field coupling a peak detection on the individual PPC spectra was run using the findpeaks command in Matlab. For theta the PPC spectrum was restricted to a frequency range between 3 to 13 Hz, and for gamma between 45 to 75 Hz. The peak PPC had to surpass a threshold of 0.005 for both hits and misses, to ensure that meaningful PPC was present in both conditions.

Non-stationarities of LFP: One may be concerned about non-stationarities of the signal and whether such non-stationarities affect the phase estimations obtained with the here applied Wavelet analysis. A specific concern is that the phase obtained from the Wavelet analysis is not correct when the instantaneous frequency of the LFP signal does not match the frequency of the Wavelet. This concern was addressed in two ways.

In a first step, a simulation was carried out where an oscillator in the LFP signal transitions randomly between frequencies with a mean frequency of 6 Hz fluctuating between 3.5 to 9 Hz, thus exhibiting strong non-stationarities across a wide range. Spikes of a hypothetical neuron were simulated to be locked to the trough of this non-stationary oscillator (see Fig. S6A-B). White noise was added to the simulated signal. The results of this simulation demonstrate that the mean frequency of spike phase locking at 6 Hz is correctly retrieved by the Wavelet analysis (Figure S6C). Crucially, the mean phase of spiking is also correctly retrieved (Figure S6D). The same simulation has been carried out for the high-frequency range with similar results. From this we can conclude that our Wavelet based approach is well suited to recover the mean frequency and mean phase of coupling between a spiking neuron and a non-stationary oscillator.

In a second step, we repeated the spike-LFP coupling analysis using a combination of band-pass filter and Hilbert transformation. The band-pass filter (Butterworth) was set to a width of 4 Hz for the low frequency range, and 8 Hz for the high frequency range, thus leaving ample opportunity for variations in instantaneous frequency. Trials were segmented as before to 14 seconds centred at the onset of the cue stimulus (i.e., animal), to ensure that filter artifacts at the beginning and end of the trial are well out of the time window of interest (i.e., 2-3 seconds after cue onset). The band-pass filter was implemented using the ft\_preprocessing command in fieldtrip centred at discrete steps of 1 Hz between 3 to 40 Hz (i.e., 3 = 1 to 5 Hz; 4 = 2 to 6 Hz; ... 40 = 38 to 42 Hz) and 2 Hz between 40 to 80 Hz (i.e., 40 = 36 to 44 Hz; 42 = 38 to 46 Hz; ... 80 = 76 to 84 Hz). Phase was estimated using the Hilbert transform as implemented in fieldtrip (ft\_preprocessing) and phase

variance was obtained using pair-wise phase consistency (PPC) as described above. The results of this analysis are reported in Supplementary Figure S7.

750

Directionality of distal theta spike-field coupling: To assess the direction of information between spikes and distally coupled LFPs the Phase Slope Index (PSI) was applied (49). The PSI is a frequency resolved measure of the direction of information flow between two time series A and B. As most directional coupling measures, the phase slope index assumes that it requires time for a signal to travel from A to B. If the speed at which different waves travel is similar, then the phase difference between sender and recipient increases with frequency and we expect a positive slope of the phase spectrum. Hence, a positive phase slope indicates that A is the sender and B is the receiver, and vice versa. We preferred the phase slope index over Granger causality as it requires less assumptions and is less sensitive to noise (49). The PSI was calculated using the `ft_connectivityanalysis` function in `fieldtrip` using a bandwidth of 5 Hz (i.e., phase slopes are estimated over a 5 Hz window). Spike time series were convolved with a Gaussian window (25 ms) to yield a continuous spike density signal. The raw PSI values were baseline corrected using a z-transformation to ensure an unbiased comparison between hits and misses. To this end, trials for the spike providing signal were shuffled 100 times and submitted to the same PSI analysis as the real data. This shuffling was carried out separately for hits and misses, thereby keeping the number of overall spikes constant. The mean and standard deviation across shuffles was calculated and used for z-transformation of the PSI values of the real (i.e., un-shuffled) data. Finally, a minimum of 60 spikes was imposed to allow for a meaningful analysis of directional information flow between the two signals.

755

760

765

770

SFC control analysis for selection bias: In the above analysis only spike-LFP pairs, which show significant phase coupling across all trials are subjected to further analysis. This could introduce a potential bias, especially for cases where firing rates and trials are not evenly distributed between conditions (hits vs. misses). This concern would be especially problematic if the results would show an overall increase in spike-field coupling for hits vs. misses, as opposed to differences in peak frequencies as shown here. Nevertheless, we accounted for this issue by means of a control analysis. In this control analysis, PPC values for a given spike-LFP pair were calculated for 5000 instances where the trials for spike providing and LFP providing data were shuffled. As above, all other parameters (importantly number of hit and miss trials were kept constant). After each shuffle a Raleigh test as above was carried out across all trials. If this test retained a p-value <0.05 (FDR-corrected) PPC spectra were calculated for ‘pseudo-hits’ and ‘pseudo-misses’. These spectra therefore contain the same selection bias as in the real analysis because the ratio between hits and misses has been kept constant, and therefore provide a baseline for hits and misses which can be used to effectively correct for this bias. Accordingly, PPC values for each spike-LFP pair for the real data were z-transformed using this baseline by subtracting the mean across ‘significant’ shuffle runs and dividing by the standard deviation. This bias corrected data was submitted the same peak detection analysis as the real data and similar results were obtained (see Figure S5).

775

780

785

790

Theta-Gamma Interaction: To assess the spatial overlap of local SFC in the gamma range and distal SFC in the low frequency range the number of spike-LFP pairs were counted that exhibited both phenomena in the same region (i.e., same microwire bundle). Cross-frequency coupling (CFC) was then analysed for these overlapping pairs of locally and distally coupled spike-LFP channels. To this end, both theta and gamma LFPs were taken from the same bundle of microwires

795 and therefore were recorded in the same region (or at least in very close proximity; see Figure 4A-  
B). The PAC analysis therefore does reflect the temporal coordination of theta and gamma  
oscillations in a local region. It is only that the locally recorded theta is phase locked to a spike  
recorded in another, distally coupled, region. For each channel pair the peak gamma frequency,  
and the peak theta frequency was extracted from the PPC spectra. Importantly, these peaks were  
800 extracted separately for hits and misses, to account for the difference in frequency between the two  
conditions. Peaks at gamma were restricted to a frequency range between 50 to 80 Hz, and 5 to 11  
Hz for theta. Phase for the lower frequencies (i.e., theta) and power for the higher frequencies (i.e.,  
gamma) were calculated using the same Wavelet parameters as above (i.e., 6 cycles for theta, 12  
cycles for gamma). Cross-frequency coupling was then calculated via the Modulation Index (31)  
using the function 'ModIndex\_v2.m' provided by Adriano Tort with a binning parameter of 18  
805 bins  
([https://github.com/cineguerrilha/Neurodynamics/blob/master/16ch/Comodulation/ModIndex\\_v2](https://github.com/cineguerrilha/Neurodynamics/blob/master/16ch/Comodulation/ModIndex_v2.m)  
.m). The MI was calculated separately for hits and misses. Because the MI is affected by trial  
numbers, a normalization procedure was applied to yield a bias free CFC measure for hits and  
misses. To this end, trials for the phase providing channel were shuffled and MI was calculated  
810 after each shuffle (N=200). This was done separately for each condition (hits and misses) to  
generate a baseline MI under the null for each condition. The mean and standard deviation across  
the shuffled data was then used to z-transform the MI of the real data.

Power Analysis: Power of LFP data was calculated using the same wavelet parameters for high  
815 and low frequency ranges as above. Raw power values were z-transformed for each channel  
separately using a common procedure for analysing subsequent memory effects (21, 50, 51).  
Power values for each channel, frequency band and trial, were first averaged across time (-0.5 to  
5 seconds). Then the median and standard deviation of this time-averaged power across trials was  
calculated. Power values for each channel, frequency bin and trial were then z-transformed by  
820 subtracting median power and dividing by standard deviation. Trials containing outlier power  
values (i.e., maxima > 2.5 of standard deviation of maxima across trials) were discarded. Finally,  
trials were split according to conditions (hits and misses) and averaged. Power for low frequencies  
was calculated for channels which showed a significant SFC in the low frequency range, whereas  
power for high frequencies was calculated only for those channels showing significant SFC in the  
825 high frequencies.

An additional power analysis was carried out to assess the presence of a meaningful signal at the  
frequencies where spike-LFP coupling was observed (see Figure S8). To this end power at spike  
times was extracted for distally coupled LFPs in the low frequency range, and locally coupled  
LFPs in the gamma frequency range using the same Wavelet filter as used for SFC analysis. Power  
830 spectra were 1/f corrected by fitting and subtracting a linear function to the log-log transformed  
power spectra. The resulting spectra were then back transformed to linear space and centred at the  
peak frequency of PPC. Lastly, power values were normalized for each LFP channel by subtracting  
the mean across the whole spectrum and dividing by the standard deviation across the whole  
spectrum.

835 Inter-trial Phase Consistency: Inter-trial phase consistency was calculated for the lower frequency  
range (i.e., 2 – 40 Hz) using pairwise phase consistency (PPC)(28). Phase for each single trial was  
extracted using the same Wavelet transformation (6 cycles) as above. PPC spectra were limited to  
a frequency range of interest (2-13 Hz), comprising the slow and fast theta range. PPC spectra

840 were calculated for hits and misses separately and only for those channels showing significant SFC  
in the low frequency ranges.

Spike Power Analysis: To test for the presence of theta rhythmicity within the spiking of neurons  
an FFT analysis was carried out on the spike density time series. Spike time series were convolved  
845 with a Gaussian window (25 ms) to yield a continuous spike density signal for the time window  
of interest (2-3 seconds after cue onset). These trials were then submitted to a FFT analysis using  
the `ft_freqanalysis` command in `fieldtrip`, with a Hanning taper and frequency smoothing of  $\pm 2$   
Hz. Results are shown in Figure S9.

850 Theta Waveshape Asymmetry: To assess the presence of asymmetric theta waveforms, which  
could give rise to spurious cross-frequency coupling at harmonics of theta, two control analyses  
were performed. For the first control analysis, MIs were calculated exactly the same way as for  
the real data, except that for each LFP signal the gamma frequency was taken as the 8<sup>th</sup> harmonic  
855 of the theta in that signal (i.e., for theta = 9 Hz, gamma =  $9 * 8 = 72$  Hz). We took the 8<sup>th</sup> harmonic  
as this was the frequency that was on average closest to the observed gamma frequency (i.e., 64 –  
72 Hz). The 8<sup>th</sup> harmonic was estimated based on the dominant theta frequency separately for hits  
and misses. Next, we calculated the difference in MI between hits and misses. If asymmetric theta  
gives rise to the difference in CFC the real data then this effect should even be stronger in the  
860 control data where gamma was centred at the harmonic of theta. However, we observed the  
opposite pattern, with the real data showing stronger differences between hits and misses compared  
to the harmonic control data (Figure S10A).

In a second control analysis, the asymmetry index was calculated following the procedure  
described in (52). To this end, the LFP data for hits and misses was filtered at the theta phase  
providing frequency band  $\pm 2$  Hz used for CFC analysis, using a Butterworth bandpass filter  
865 implemented in `Fieldtrip`. Then the filtered data was cut to the time window of interest (2-3  
seconds) and peaks and troughs were identified using the ‘`findpeaks`’ function in `Matlab`.  
Thereafter, peaks and troughs of the filtered data were adjusted by matching them with peaks and  
troughs in the unfiltered data. This matching process searched for local maxima and minima in a  
time window of a quarter cycle length of the theta frequency (i.e.,  $5 \text{ Hz} = 200/4 = 50 \text{ ms}$ ) centred  
870 at the peak located in the filtered data. The time stamps of these adjusted peaks and troughs were  
then used to calculate the asymmetry of the theta waveshape using the formula below. Where  $T_{asc}$   
is the duration of the ascending flank,  $T_{desc}$  is the duration of the descending flank, and  $\omega$  is the  
cycle length of the theta frequency.  $T_{asc}$  was calculated by subtracting the time stamp of the trough  
from its subsequent peak (i.e.,  $T_{peak(t+1)} - T_{trough(t)}$ );  $T_{desc}$  was calculated by subtracting the  
875 time stamp of the peak from its subsequent trough (i.e.,  $T_{trough(t+1)} - T_{peak(t)}$ ). Therefore, both  
 $T_{asc}$  and  $T_{desc}$  always yield positive values. The asymmetry index (AI) is a normalized measure  
ranging between -1 and 1 with negative values indicating longer durations of descending flanks,  
and positive values indicating longer durations for ascending flanks.

880

$$AI = \frac{T_{asc} - T_{desc}}{\omega}$$

To verify that this index detects the presence of asymmetric waveforms a dataset recorded in the  
rodent entorhinal cortex was used as a positive control (courtesy of Ehren Newman). The data  
comprised 10 minutes of open field navigation of the rodent. Clear ongoing theta activity was

885 present in this data and indeed a strong asymmetry could be detected (Figure S10C). For the human  
data, AIs were averaged across trials for hits and misses separately to yield one AI per channel.  
AIs between hits and misses were compared using a paired samples T-test. No difference in  
asymmetry between hits and misses was obtained (see Figure S10D), which further rules out an  
influence of asymmetric waveshapes on the observed cross-frequency coupling results.

890

Co-firing Analysis: Co-firings between pairs of single/multi-units (referred to as units in the  
below) at different time lags were calculated via cross-correlations using the `xcorr` function in  
Matlab. To this end, spike time series for each unit were concatenated across trials to yield one  
vector and convolved with a Gaussian envelope with a width of 25ms (~10ms full width half  
895 maximum). Cross-correlations were calculated for pairs of putative ‘sending’ units, and putative  
‘receiving’ units. Putative sending units were units, which showed a significant distal SFC in the  
low frequency range, and where the distally coupled LFP was in addition locally coupled to a unit  
in the high frequency (gamma) range. This locally gamma coupled unit was taken as the putative  
receiving unit. Accordingly, the pairs were chosen such that the region where the sending unit was  
900 coupled to is the same as the region where the local coupling occurs. This resulted in a relatively  
low number of neural pairs (N=24), because two conditions needed to be met. More specifically,  
for a pair of units to be considered as such the putative sending unit needed to show significant  
distal low frequency coupling to the region where the putative receiving unit was located;  
additionally, the receiving unit needed to be significantly coupled to local gamma oscillations.  
905 This selection and labelling of units into sending and receiving units is supported by the directional  
coupling analysis (see Fig 4). Altogether, 5 patients contributed data to this analysis, with a median  
of 5 pairs per patient, and a minimum and maximum of 2 and 8 pairs per patient, respectively (see  
Supplementary Table S1).

910 Cross-correlations between putative sending and putative receiving units were calculated  
separately for hits and misses. To correct for a potential bias of numbers of spikes, cross-  
correlation values for hits and misses were z-transformed according to a shuffled baseline. To this  
end, trials for the putative receiving unit were shuffled 2000 times and submitted to the same cross-  
correlation analysis as the real data. This shuffling was carried out separately for hits and misses,  
thereby keeping the number of overall spikes constant. The mean and standard deviation across  
915 shuffles was calculated and used for z-transformation of the cross-correlation values of the real  
(i.e., un-shuffled data). As a final step, only cross-correlations for pairs of neurons where the  
average co-incidence (mean across hits and misses) exceeded 1 at any lag were admitted to  
statistical analysis. This step ensured that only pairs of neurons with meaningful co-firings were  
used. To compare the latencies of co-firing between hits and misses a peak detection was carried  
920 out using the ‘findpeaks’ function in Matlab.

925



## Acknowledgments

We like to thank all patients for taking time to participate in the experimental sessions. We also thank Markus Siegel for providing useful comments on previous versions of the manuscript and Pieter Roelfsema for supporting us with data collection. S.H. was supported by grants from the European Research Council (Nr. 647954), and the Economic and Social Research Council (ES/R010072/1). M.tW. and M.W. were supported by a grant from the European Research Council (StG-715714).

## References and Notes

1. J. Fell, N. Axmacher, The role of phase synchronization in memory processes. *Nat Rev Neurosci* **12**, 105-118 (2011).
2. J. Fell *et al.*, Human memory formation is accompanied by rhinal-hippocampal coupling and decoupling. *Nat Neurosci* **4**, 1259-1264 (2001).
3. E. A. Solomon *et al.*, Dynamic Theta Networks in the Human Medial Temporal Lobe Support Episodic Memory. *Curr Biol* **29**, 1100-1111 e1104 (2019).
4. E. R. Kandel, The molecular biology of memory storage: a dialogue between genes and synapses. *Science* **294**, 1030-1038 (2001).
5. H. Markram, J. Lubke, M. Frotscher, B. Sakmann, Regulation of synaptic efficacy by coincidence of postsynaptic APs and EPSPs. *Science* **275**, 213-215 (1997).
6. G. Bi, M. Poo, Synaptic modification by correlated activity: Hebb's postulate revisited. *Annu Rev Neurosci* **24**, 139-166 (2001).
7. D. O. Hebb, *The organization of behavior; a neuropsychological theory*, A Wiley book in clinical psychology (Wiley, New York, 1949), pp. xix, 335 p.
8. V. Wespapat, F. Tennigkeit, W. Singer, Phase sensitivity of synaptic modifications in oscillating cells of rat visual cortex. *J Neurosci* **24**, 9067-9075 (2004).
9. G. Buzsaki, Neural syntax: cell assemblies, synapse ensembles, and readers. *Neuron* **68**, 362-385 (2010).
10. P. Fries, Rhythms for Cognition: Communication through Coherence. *Neuron* **88**, 220-235 (2015).
11. W. Singer, Neuronal synchrony: a versatile code for the definition of relations? *Neuron* **24**, 49-65, 111-125 (1999).
12. M. J. Jutras, E. A. Buffalo, Synchronous neural activity and memory formation. *Curr Opin Neurobiol* **20**, 150-155 (2010).
13. P. T. Huerta, J. E. Lisman, Bidirectional synaptic plasticity induced by a single burst during cholinergic theta oscillation in CA1 in vitro. *Neuron* **15**, 1053-1063 (1995).
14. J. M. Hyman, B. P. Wyble, V. Goyal, C. A. Rossi, M. E. Hasselmo, Stimulation in hippocampal region CA1 in behaving rats yields long-term potentiation when delivered to the peak of theta and long-term depression when delivered to the trough. *J Neurosci* **23**, 11725-11731 (2003).
15. S. Hanslmayr, B. P. Staresina, H. Bowman, Oscillations and Episodic Memory: Addressing the Synchronization/Desynchronization Conundrum. *Trends Neurosci* **39**, 16-25 (2016).
16. U. Rutishauser, I. B. Ross, A. N. Mamelak, E. M. Schuman, Human memory strength is predicted by theta-frequency phase-locking of single neurons. *Nature* **464**, 903-907 (2010).
17. M. J. Jutras, P. Fries, E. A. Buffalo, Gamma-band synchronization in the macaque hippocampus and memory formation. *J Neurosci* **29**, 12521-12531 (2009).
18. B. J. Griffiths, M. C. Martin-Buro, B. P. Staresina, S. Hanslmayr, Disentangling neocortical alpha/beta and hippocampal theta/gamma oscillations in human episodic memory formation. *Neuroimage* **242**, 118454 (2021).
19. B. Lega, J. Burke, J. Jacobs, M. J. Kahana, Slow-Theta-to-Gamma Phase-Amplitude Coupling in Human Hippocampus Supports the Formation of New Episodic Memories. *Cereb Cortex* **26**, 268-278 (2016).
20. L. L. Colgin *et al.*, Frequency of gamma oscillations routes flow of information in the hippocampus. *Nature* **462**, 353-357 (2009).
21. B. Griffiths *et al.*, Directional coupling of slow and fast hippocampal gamma with neocortical alpha/beta oscillations in human episodic memory. *Proc Natl Acad Sci U S A* **in press** (2019).

22. C. W. Dickey *et al.*, Travelling spindles create necessary conditions for spike-timing-dependent plasticity in humans. *Nat Commun* **12**, 1027 (2021).
- 980 23. A. Tankus, Y. Yeshurun, I. Fried, An automatic measure for classifying clusters of suspected spikes into single cells versus multiunits. *J Neural Eng* **6**, 056001 (2009).
24. J. F. Burke, A. G. Ramayya, M. J. Kahana, Human intracranial high-frequency activity during memory processing: neural oscillations or stochastic volatility? *Curr Opin Neurobiol* **31**, 104-110 (2015).
- 985 25. G. Buzsaki, E. W. Schomburg, What does gamma coherence tell us about inter-regional neural communication? *Nat Neurosci* **18**, 484-489 (2015).
26. S. Liebe, G. M. Hoerzer, N. K. Logothetis, G. Rainer, Theta coupling between V4 and prefrontal cortex predicts visual short-term memory performance. *Nat Neurosci* **15**, 456-462, S451-452 (2012).
27. S. N. Jacob, D. Hahnke, A. Nieder, Structuring of Abstract Working Memory Content by Fronto-parietal Synchrony in Primate Cortex. *Neuron* **99**, 588-597 e585 (2018).
- 990 28. M. Vinck, M. van Wingerden, T. Womelsdorf, P. Fries, C. M. Pennartz, The pairwise phase consistency: a bias-free measure of rhythmic neuronal synchronization. *Neuroimage* **51**, 112-122 (2010).
29. D. Bush, N. Burgess, Advantages and detection of phase coding in the absence of rhythmicity. *Hippocampus* **30**, 745-762 (2020).
- 995 30. T. Eliav *et al.*, Nonoscillatory Phase Coding and Synchronization in the Bat Hippocampal Formation. *Cell* **175**, 1119-1130 e1115 (2018).
31. A. B. Tort, R. Komorowski, H. Eichenbaum, N. Kopell, Measuring phase-amplitude coupling between neuronal oscillations of different frequencies. *J Neurophysiol* **104**, 1195-1210 (2010).
32. J. Aru *et al.*, Untangling cross-frequency coupling in neuroscience. *Curr Opin Neurobiol* **31**, 51-61 (2015).
- 1000 33. B. C. Lega, J. Jacobs, M. Kahana, Human hippocampal theta oscillations and the formation of episodic memories. *Hippocampus* **22**, 748-761 (2012).
34. A. Goyal *et al.*, Functionally distinct high and low theta oscillations in the human hippocampus. *Nat Commun* **11**, 2469 (2020).
35. J. Jacobs, Hippocampal theta oscillations are slower in humans than in rodents: implications for models of spatial navigation and memory. *Philos Trans R Soc Lond B Biol Sci* **369**, 20130304 (2014).
- 1005 36. U. Slawinska, S. Kasicki, The frequency of rat's hippocampal theta rhythm is related to the speed of locomotion. *Brain Res* **796**, 327-331 (1998).
37. G. R. Richard *et al.*, Speed modulation of hippocampal theta frequency correlates with spatial memory performance. *Hippocampus* **23**, 1269-1279 (2013).
- 1010 38. G. Buzsaki, D. Tingley, Space and Time: The Hippocampus as a Sequence Generator. *Trends Cogn Sci* **22**, 853-869 (2018).
39. J. E. Lisman, O. Jensen, The theta-gamma neural code. *Neuron* **77**, 1002-1016 (2013).
40. F. Roux, P. J. Uhlhaas, Working memory and neural oscillations: alpha-gamma versus theta-gamma codes for distinct WM information? *Trends Cogn Sci* **18**, 16-25 (2014).
- 1015 41. A. von Stein, J. Sarnthein, Different frequencies for different scales of cortical integration: from local gamma to long range alpha/theta synchronization. *Int J Psychophysiol* **38**, 301-313 (2000).
42. D. H. Brainard, The psychophysics toolbox. *Spatial vision* **10**, 433-436 (1997).
43. R. Q. Quiroga, Z. Nadasdy, Y. Ben-Shaul, Unsupervised spike detection and sorting with wavelets and superparamagnetic clustering. *Neural Comput* **16**, 1661-1687 (2004).
- 1020 44. M. J. Ison, R. Quiroga, I. Fried, Rapid Encoding of New Memories by Individual Neurons in the Human Brain. *Neuron* **87**, 220-230 (2015).
45. J. Jacobs, M. J. Kahana, A. D. Ekstrom, I. Fried, Brain oscillations control timing of single-neuron activity in humans. *J Neurosci* **27**, 3839-3844 (2007).
46. R. Oostenveld, P. Fries, E. Maris, J. M. Schoffelen, FieldTrip: Open source software for advanced analysis of MEG, EEG, and invasive electrophysiological data. *Comput Intell Neurosci* **2011**, 156869 (2011).
- 1025 47. J. F. Hipp, D. J. Hawellek, M. Corbetta, M. Siegel, A. K. Engel, Large-scale cortical correlation structure of spontaneous oscillatory activity. *Nat Neurosci* **15**, 884-890 (2012).
48. Y. Benjamini, Y. Hochberg, Controlling the False Discovery Rate - a Practical and Powerful Approach to Multiple Testing. *J R Stat Soc B* **57**, 289-300 (1995).
- 1030 49. G. Nolte *et al.*, Robustly estimating the flow direction of information in complex physical systems. *Phys Rev Lett* **100**, 234101 (2008).
50. P. B. Sederberg *et al.*, Hippocampal and neocortical gamma oscillations predict memory formation in humans. *Cereb Cortex* **17**, 1190-1196 (2007).

51. J. F. Burke *et al.*, Synchronous and asynchronous theta and gamma activity during episodic memory formation. *J Neurosci* **33**, 292-304 (2013).

1035

52. M. A. Belluscio, K. Mizuseki, R. Schmidt, R. Kempter, G. Buzsaki, Cross-frequency phase-phase coupling between theta and gamma oscillations in the hippocampus. *J Neurosci* **32**, 423-435 (2012).
